# Supplementary material for: Co-doped perovskite nanocrystals for multiplexed anticounterfeiting applications
Source: Royal Society of Chemistry journal article supplement (doi:10.1039/d4nr05313c), 2025-01-01
Supplement: d4nr05313c1.pdf [file d4nr05313c1.pdf]

## Supporting information:

### Codoped perovskite nanocrystals for multiplexed anticounterfeiting applications

Manoj Sharma<sup>1\*</sup>, Chang Cao<sup>1</sup>, Gaveshana. A. Sepalage<sup>1</sup>, Shi Tang<sup>2</sup>, Lan Nguyen<sup>1</sup>, Hao Deng<sup>1,3</sup>,  
Naufan Nurrosyid<sup>1</sup>, Junlin Yan<sup>1</sup>, Josh Moon<sup>1</sup>, Tuncay Alan<sup>3</sup>, James Andell Hutchison<sup>2</sup>, Paul  
Mulvaney<sup>2</sup>, Jacek. J. Jasieniak<sup>1\*</sup>

<sup>1</sup> Department of Materials Science and Engineering, Monash University, Clayton, Victoria 3800, Australia;

<sup>2</sup> School of Chemistry and ARC Centre of Excellence in Exciton Science, University of Melbourne, Parkville, VIC, 3010 Australia;

<sup>3</sup>Department of Mechanical and Aerospace Engineering, Monash University, Clayton, Victoria 3800, Australia

E-mail: manojsharma@monash.edu;

Jacek.Jasieniak@monash.edu

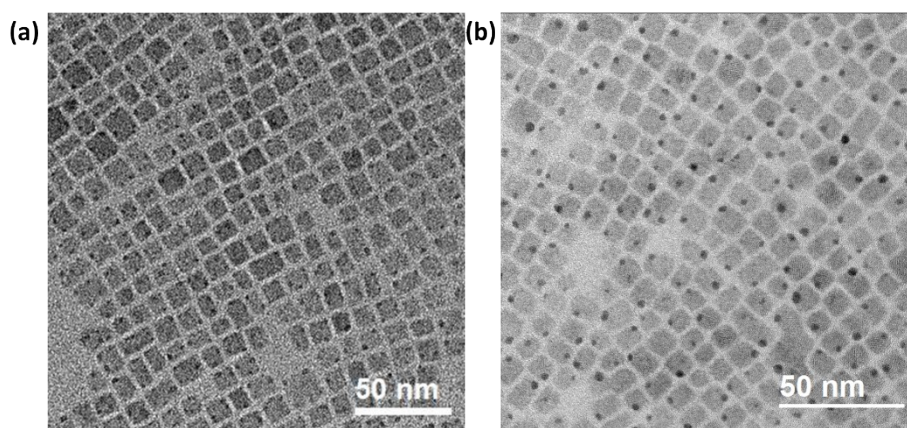

**Figure S1.** (A-B) TEM images for undoped and Mn-doped CsPbCl<sub>3</sub> NCs.

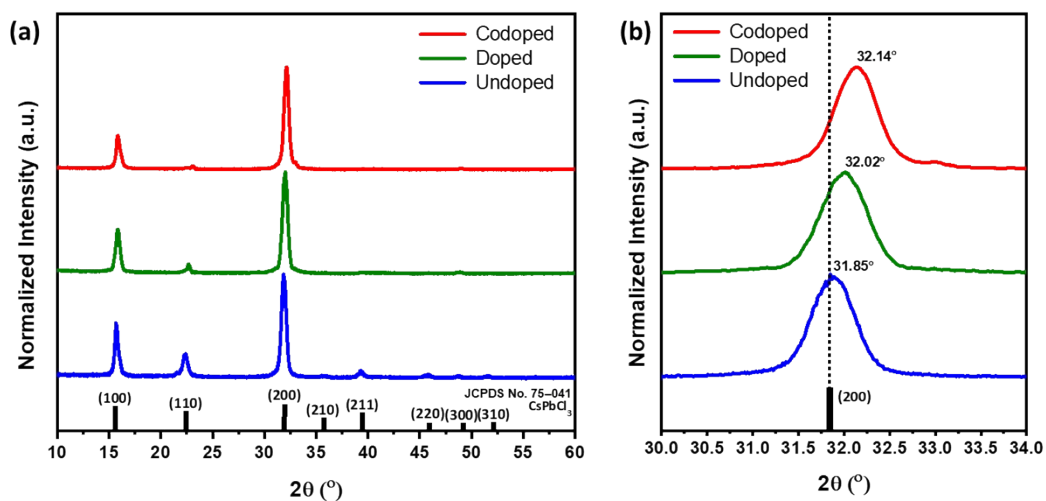

**Figure S2.** XRD for codoped, doped and undoped CsPbCl<sub>3</sub> NCs.

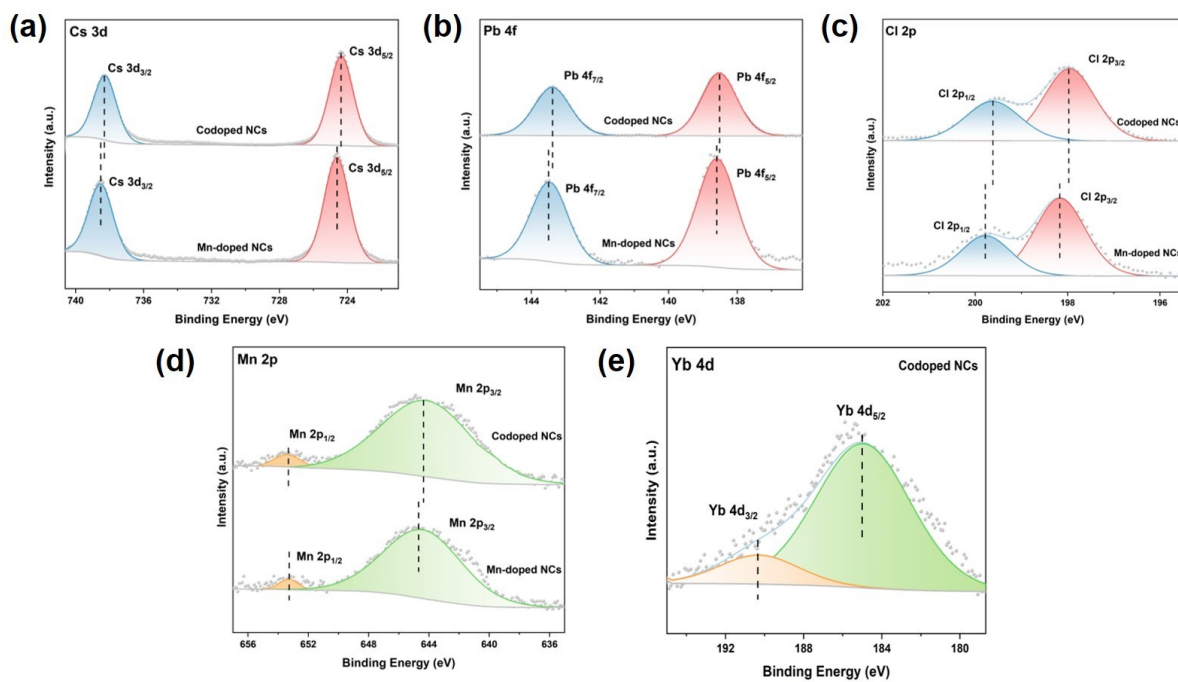

**Figure S3.** High-resolution XPS spectra for Cs (3d), Pb (4f), Cl(2p), Mn (2p), and Yb (4d) orbitals for doped and codoped CsPbCl<sub>3</sub> NCs.

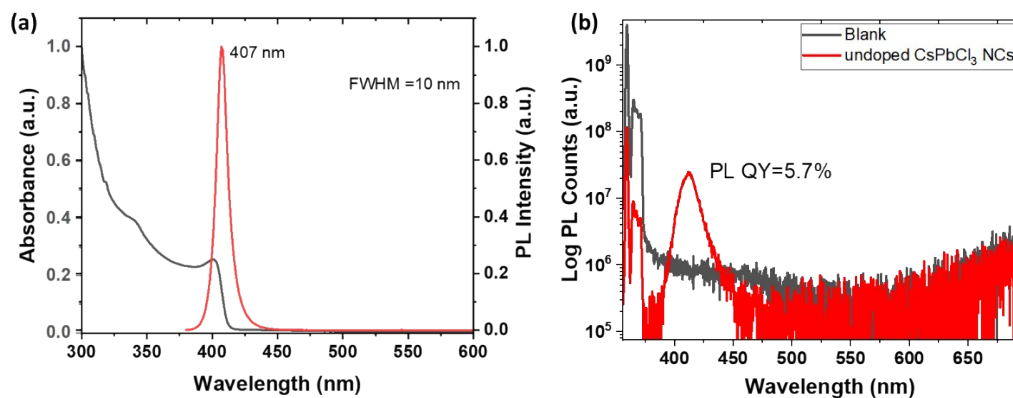

**Figure S4.** (a) UV-visible absorbance and PL emission for undoped CsPbCl<sub>3</sub> NCs. (b) PL Quantum efficiency for undoped CsPbCl<sub>3</sub> NCs.

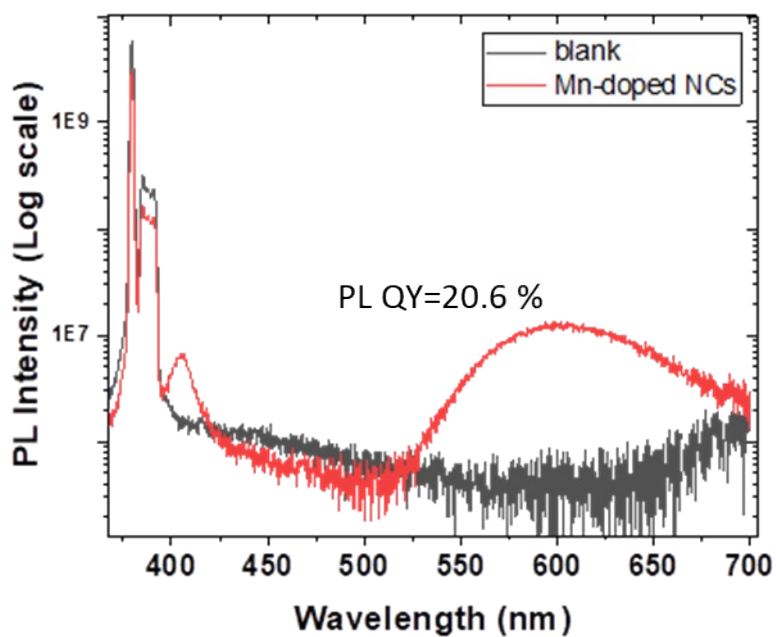

**Figure S5:** PL Quantum efficiency measured for the visible region for Mn-doped CsPbCl<sub>3</sub> NCs.

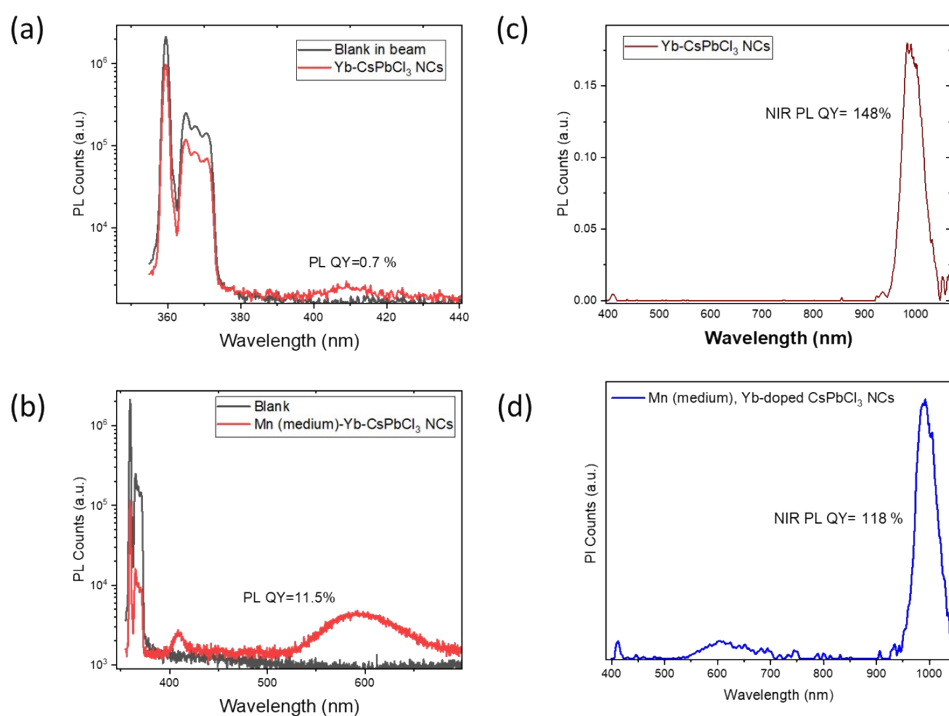

**Figure S6:** (a, b) PL Quantum efficiency measured for the visible region for Yb-doped and Yb-Mn codoped CsPbCl<sub>3</sub> NCs. (c-d) PL spectra were recorded with a calibrated detector in the region of 300-1070 nm. Relative PL QY of the NIR region is estimated as ~148 % and ~118 % for Yb-doped and Yb-Mn codoped NCs, respectively.

**TableS1. Details related to the fitting of decay curves for BE emissions**

| Band edge emission                    | A <sub>1</sub> | A <sub>2</sub> | A <sub>3</sub> | τ <sub>1</sub> (ns) | τ <sub>2</sub> (ns) | τ <sub>3</sub> (ns) | τ <sub>average</sub> (ns) |
|---------------------------------------|----------------|----------------|----------------|---------------------|---------------------|---------------------|---------------------------|
| CsPbCl <sub>3</sub> (410 nm)          | 0.12           | 89.3           | 3.55           | 16.65               | 4.15                | 0.63                | 6.85                      |
| CsPbCl <sub>3</sub> : Mn ( 410 nm)    | 313.76         | 1968.53        | 12349.37       | 7.95                | 1.13                | 0.23                | 3.01                      |
| CsPbCl <sub>3</sub> : Mn, Yb (410 nm) | 15.75          | 23.1           | 72             | 4.05                | 0.45                | 0.08                | 0.73                      |

**TableS2. Details related to the fitting of decay curves for Mn and Yb emissions**

| Dopant emission                   | A <sub>1</sub> | A <sub>2</sub> | τ <sub>1</sub> (ms) | τ <sub>2</sub> (ms) | τ <sub>average</sub> (ms) |
|-----------------------------------|----------------|----------------|---------------------|---------------------|---------------------------|
| CsPbCl <sub>3</sub> : Mn (600 nm) | 1.50           | 7.61           | 6.30                | 1.68                | 1.60                      |

|                                             |       |       |      |      |      |
|---------------------------------------------|-------|-------|------|------|------|
| CsPbCl <sub>3</sub> : Yb,<br>Mn (600<br>nm) | 15.41 | 41.79 | 4.66 | 1.33 | 1.23 |
| CsPbCl <sub>3</sub> : Yb,<br>Mn (990 nm)    | 1.80  | 7.83  | 6.4  | 2.13 | 2.04 |

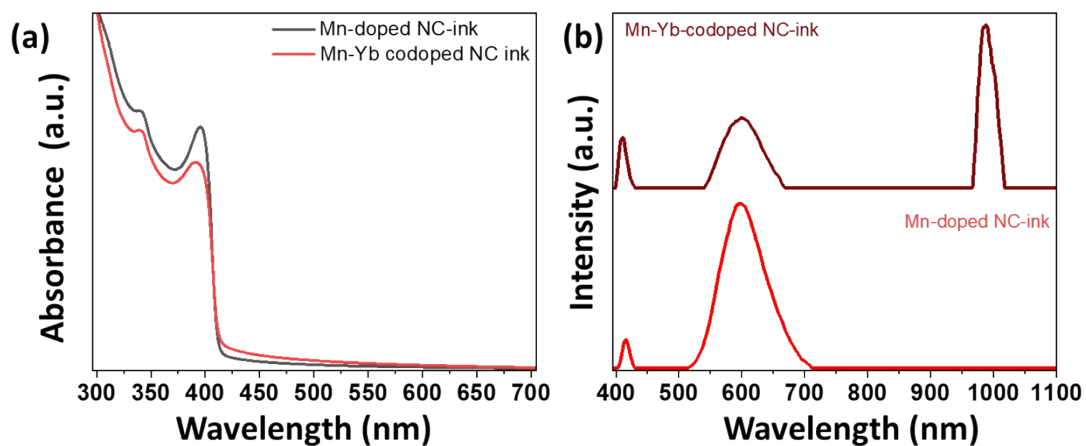

**Figure S7.** UV-visible absorbance and PL emission for EVA-based Mn-doped and Mn-Yb codoped CsPbCl<sub>3</sub> NC inks.

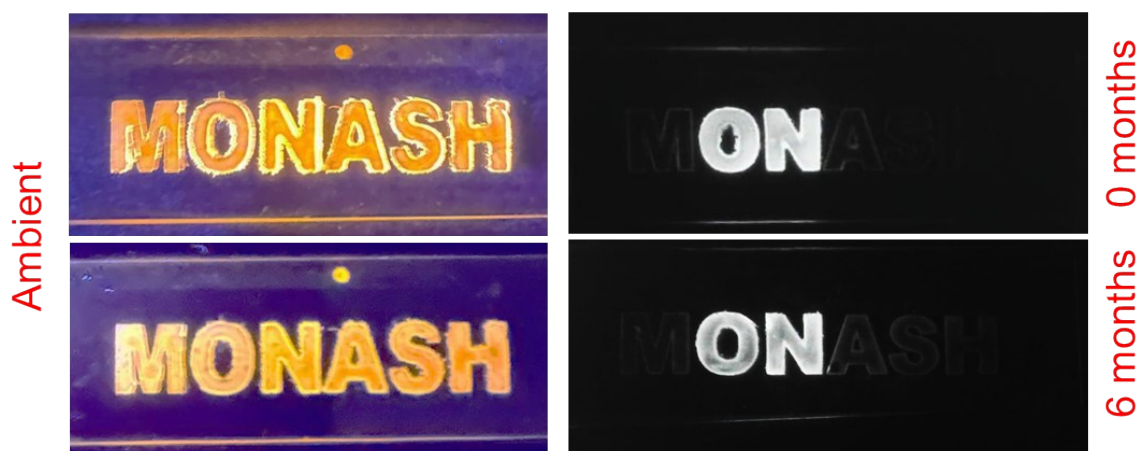

**Figure S8.** Stability as a function of time for storage in ambient.

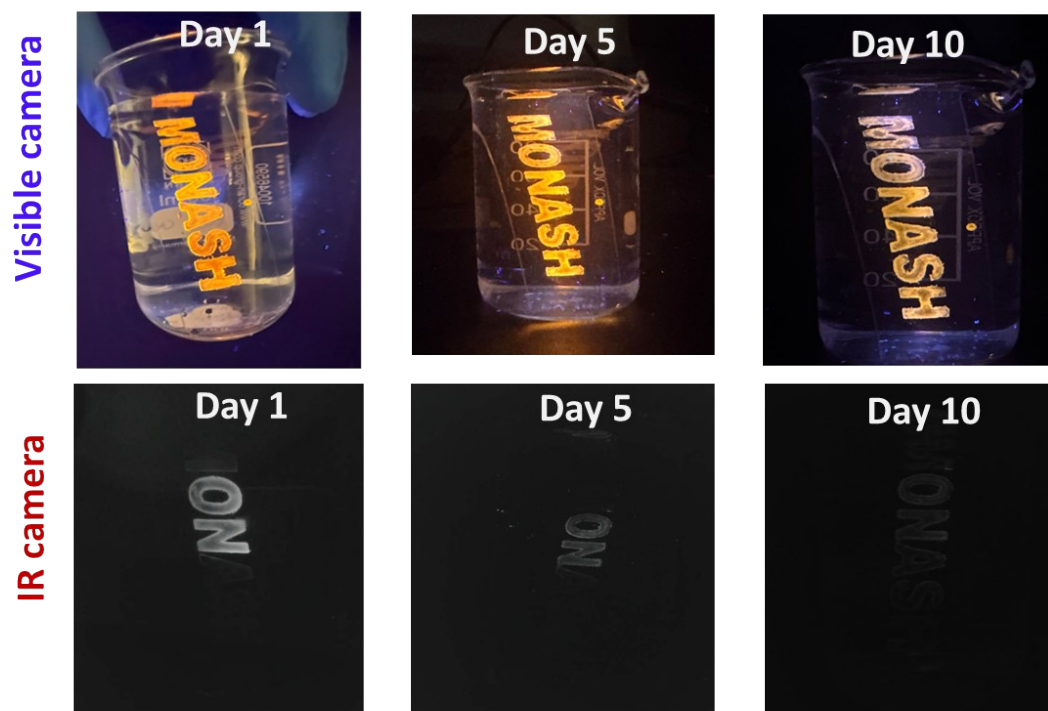

**Figure S9.** Digital images using visible and IR cameras for NC patterns in water at different intervals.

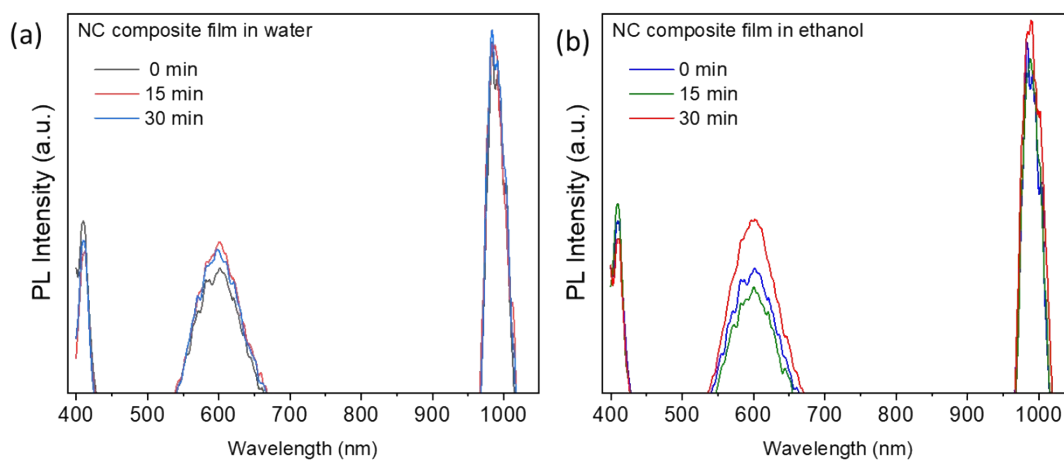

**Figure S10.** PL emission spectra of codoped NC-EVA composites exposed to different solvents. In contrast, the PL emission spectra for bare NCs are diminished within one minute of exposure to both water and ethanol.

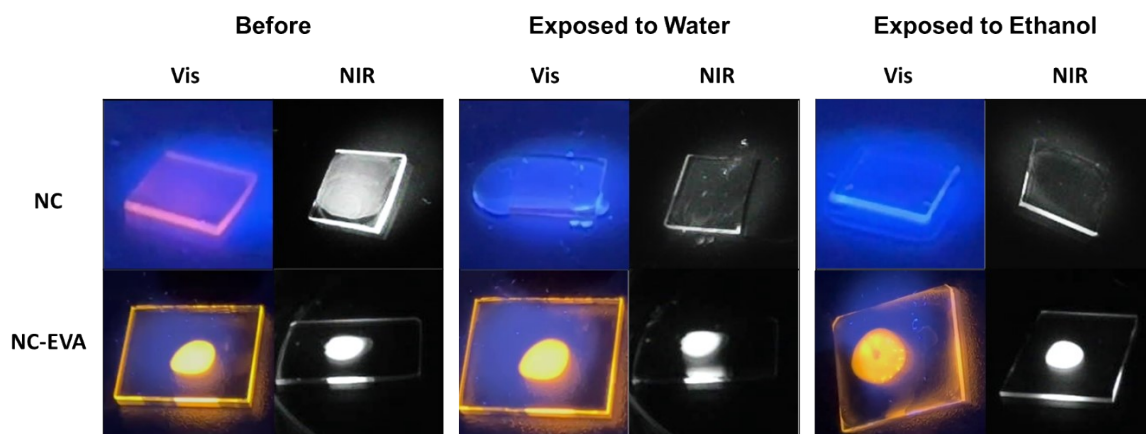

**Figure S11.** Digital images for bare Mn-Yb codoped NCs and Mn-Yb codoped NCs-EVA composite with visible and IR camera before and after dipping with water and ethanol and recorded at the same time frame.

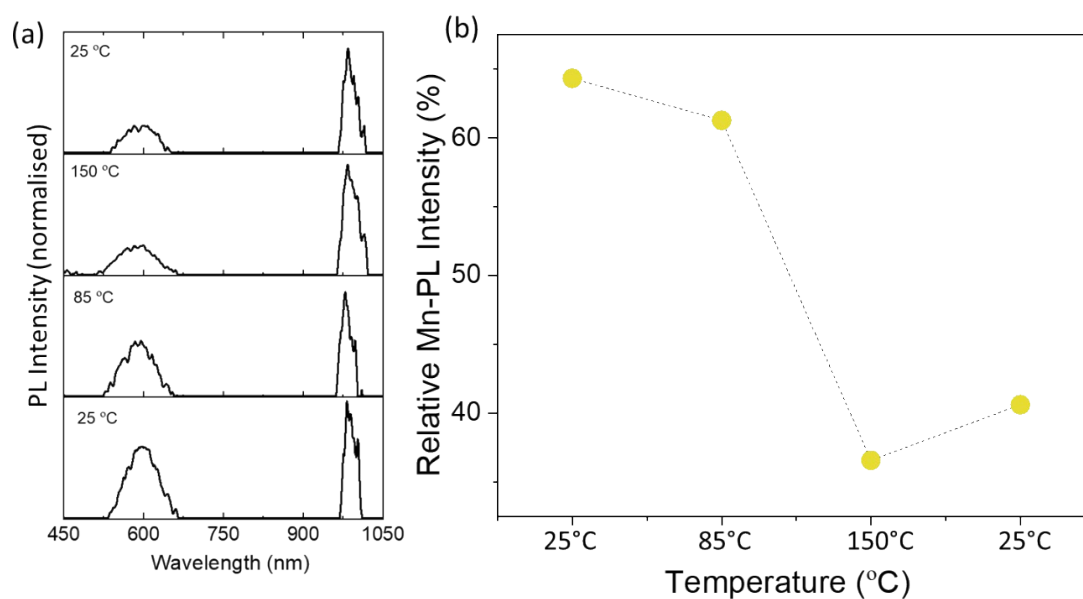

**Figure S12.** (a) Normalised PL emission spectra of NC composite at different temperatures. (b) Relative PL intensity for Mn-emission is calculated with respect to total integrated PL intensity.



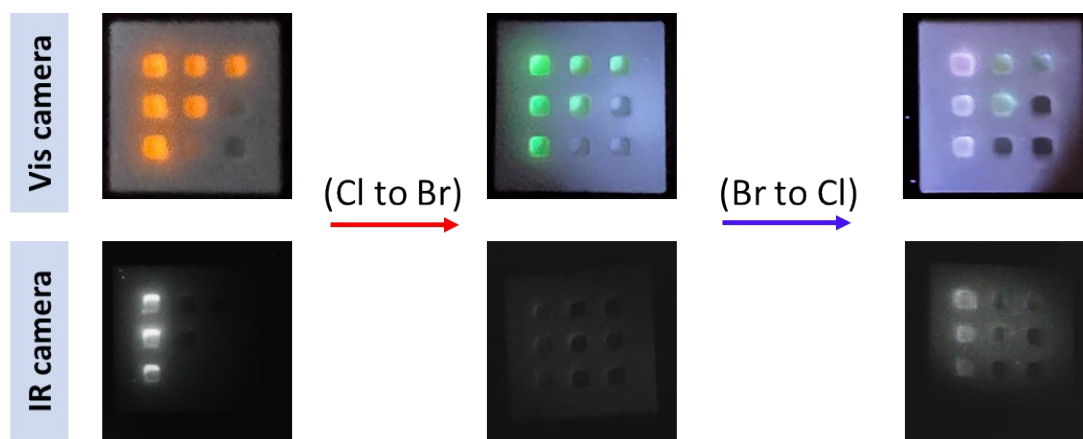

**Figure S13.** Halide exchange reactions to erase and partially re-activate the secret encrypted information. Square boxes filled with a combination of doped and codoped NC inks. (left to right) digital images under the visible camera and IR camera coupled with a visible long pass filter for NC pattern undergoing anion exchange from Cl to Br and then Br to Cl.
